# Supplementary material for: Bleomycin promotes cellular senescence and activation of the cGAS-STING pathway without direct effect on fibrosis in an idiopathic pulmonary fibrosis model
Source: publisher site journal article supplement (doi:10.18632/aging.206312), 2025-08-28
Supplement: Supplementary file [file aging-v17-206312-supplementary-material-SD1.pdf]

## SUPPLEMENTARY FIGURES

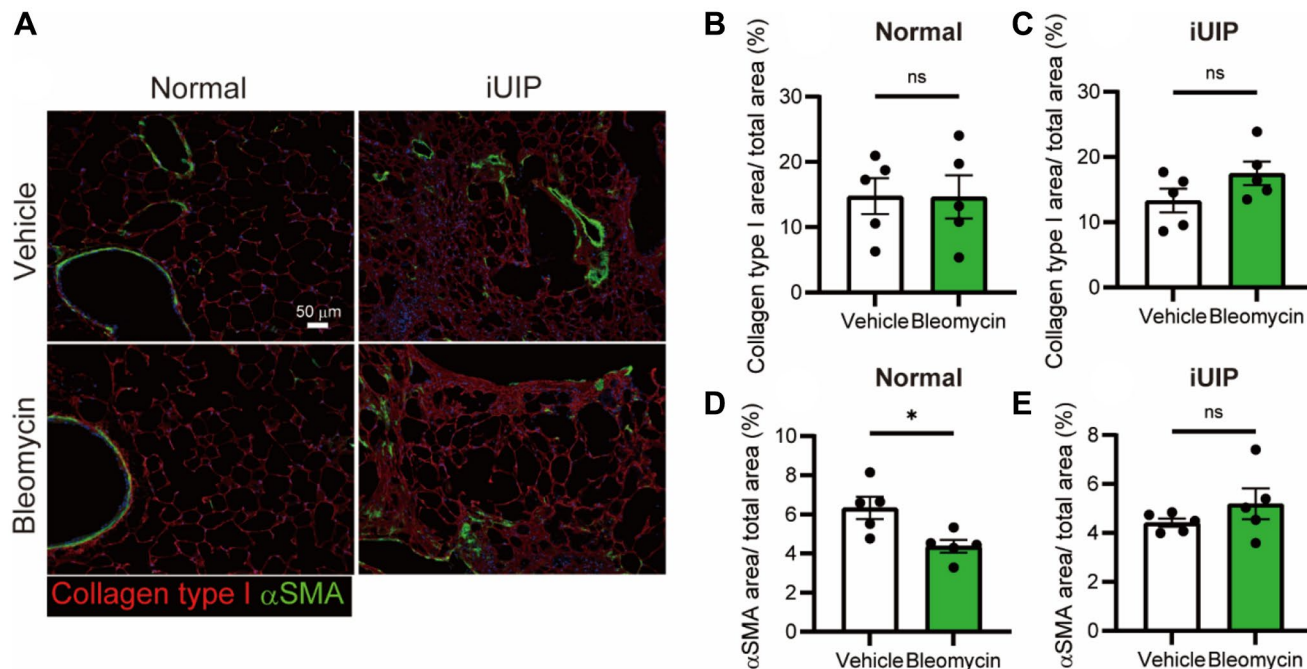

**Supplementary Figure 1.** (A) Immunohistochemical staining of collagen type I (red) and α-smooth muscle actin (αSMA; green) in PCLS samples from normal and iUIP treated with the vehicle or 1 μM bleomycin for 48 h. Scale bar indicates 50 μm. (B–E) Percentage of collagen type I-area and αSMA-area were calculated based on the total area in each PCLS. The results are shown as mean ± SE of five mice at each stage. Asterisks indicate \**P* < 0.05 compared with the vehicle. "ns", not statistically significant.

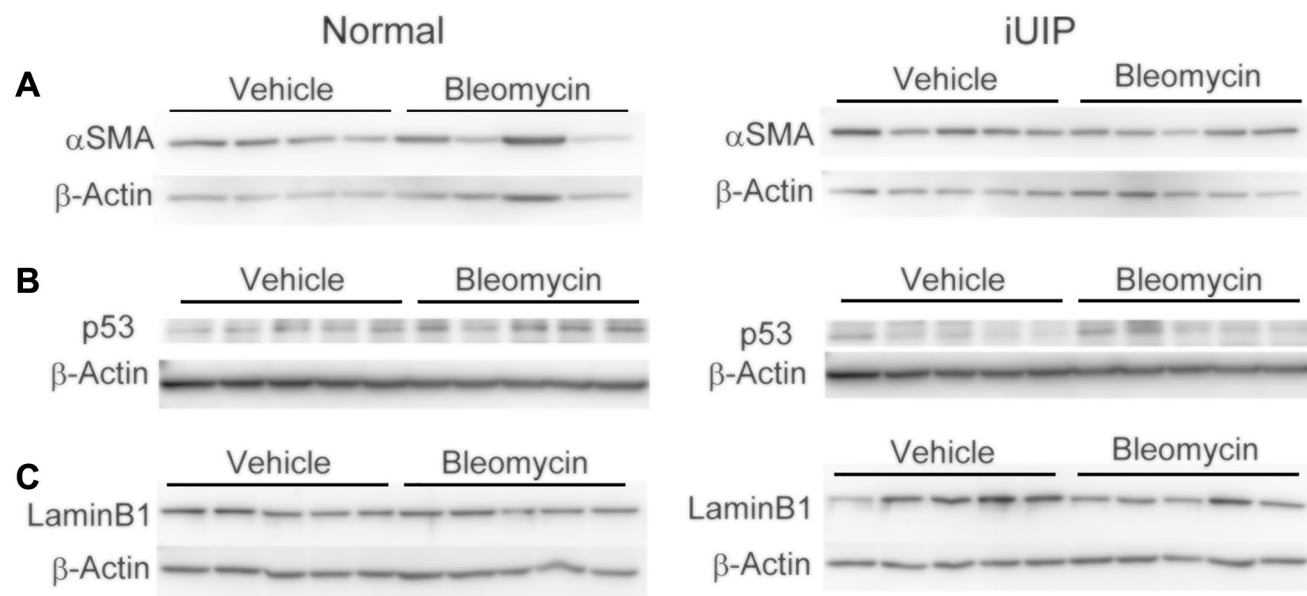

**Supplementary Figure 2.** PCLS samples were treated with the vehicle or 1 μM bleomycin for 48 h. PCLS samples were lysed and analyzed by WB using antibodies against αSMA (A), p53 (B), and LaminB1 (C). β-Actin was used as an internal control for WB. Four or five mouse PCLS samples at each group.

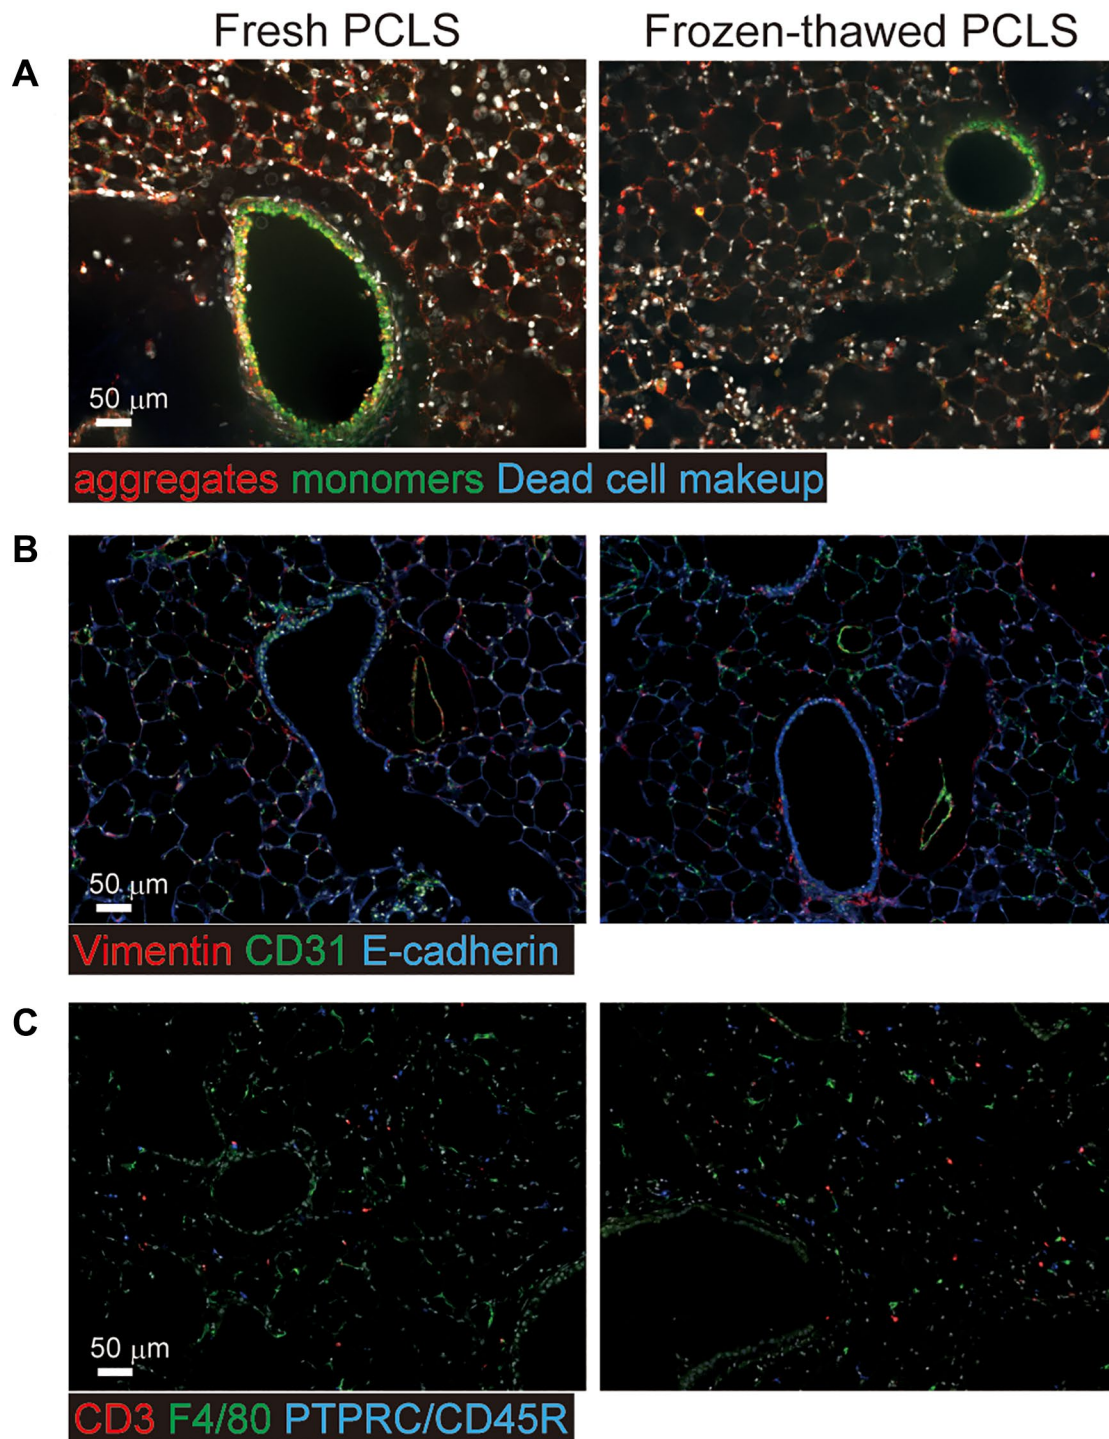

**Supplementary Figure 3. Fresh (never frozen) and frozen-thawed PCLS samples were used.** (A) Representative mitochondrial activity using JC-1 MitoMP (aggregates: red and monomers: green) and cell death using Dead cell makeup (blue) in fresh and frozen-thawed PCLS. (B) Immunohistochemical staining of vimentin (red), CD31 (green), and E-cadherin (blue) in fresh or frozen-thawed PCLS samples. (C) Immunohistochemical staining of CD3 (red), F4/80 (green), and PTPRC/CD45R (blue) in fresh or frozen-thawed PCLS samples. Scale bars indicate 50 µm.

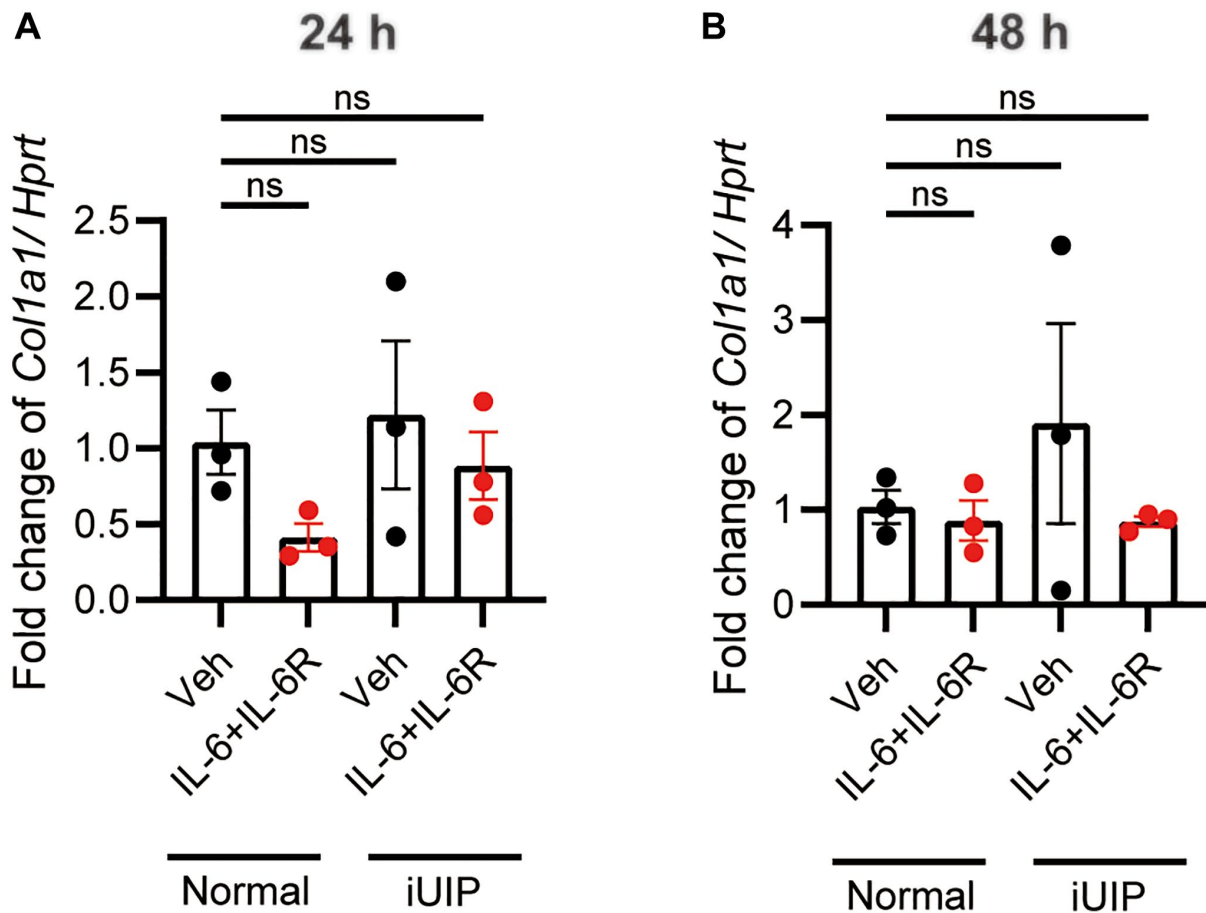

**Supplementary Figure 4.** (A, B) PCLS samples were treated with the vehicle or 50 ng/ml IL-6 and 50 ng/ml IL-6R for 24 h (A) or 48 h (B). *Col1a1* expression was determined using qPCR. *Hprt* was used as an internal control for qPCR. The results are shown as mean  $\pm$  SE of three (A, B) mice at each stage. "ns", not statistically significant.

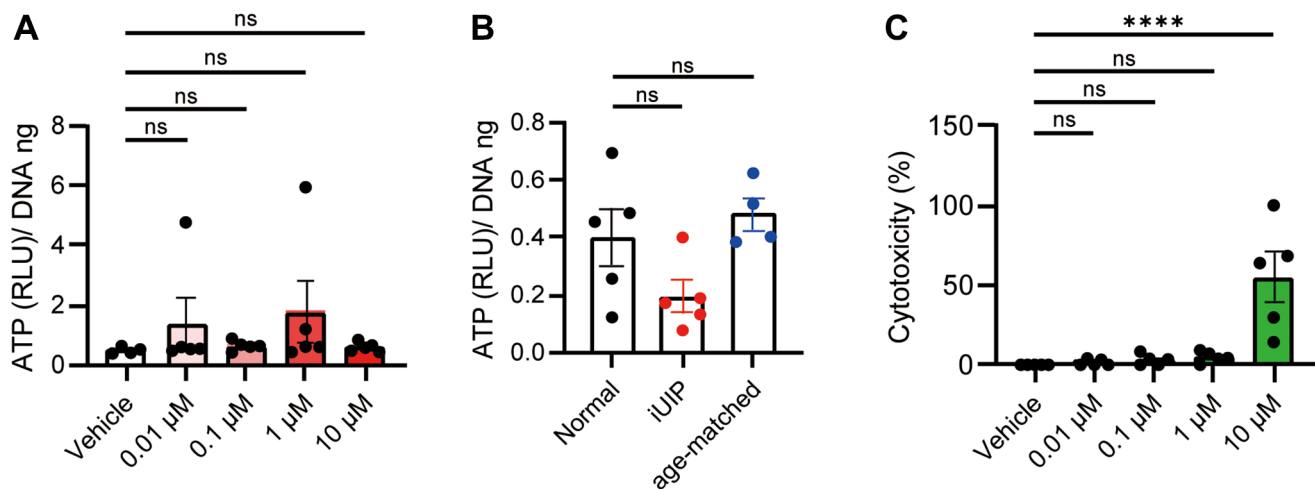

**Supplementary Figure 5.** (A) Extracellular ATP levels were examined in PCLS from age-matched controls treated with the vehicle or 0.01–10  $\mu$ M bleomycin for 4 h. (B) Extracellular ATP was examined in PCLS from normal, iUIP, and age-matched controls treated with the vehicle for 4 h. (C) LDH assay was performed in PCLS from age-matched controls treated with the vehicle or 0.01–10  $\mu$ M bleomycin for 48 h. Values were normalized to DNA content. The results are shown as mean  $\pm$  SE of five mice at each stage. Asterisks indicate \*\*\*\* $P$  < 0.0001 compared with the vehicle. "ns", not statistically significant.

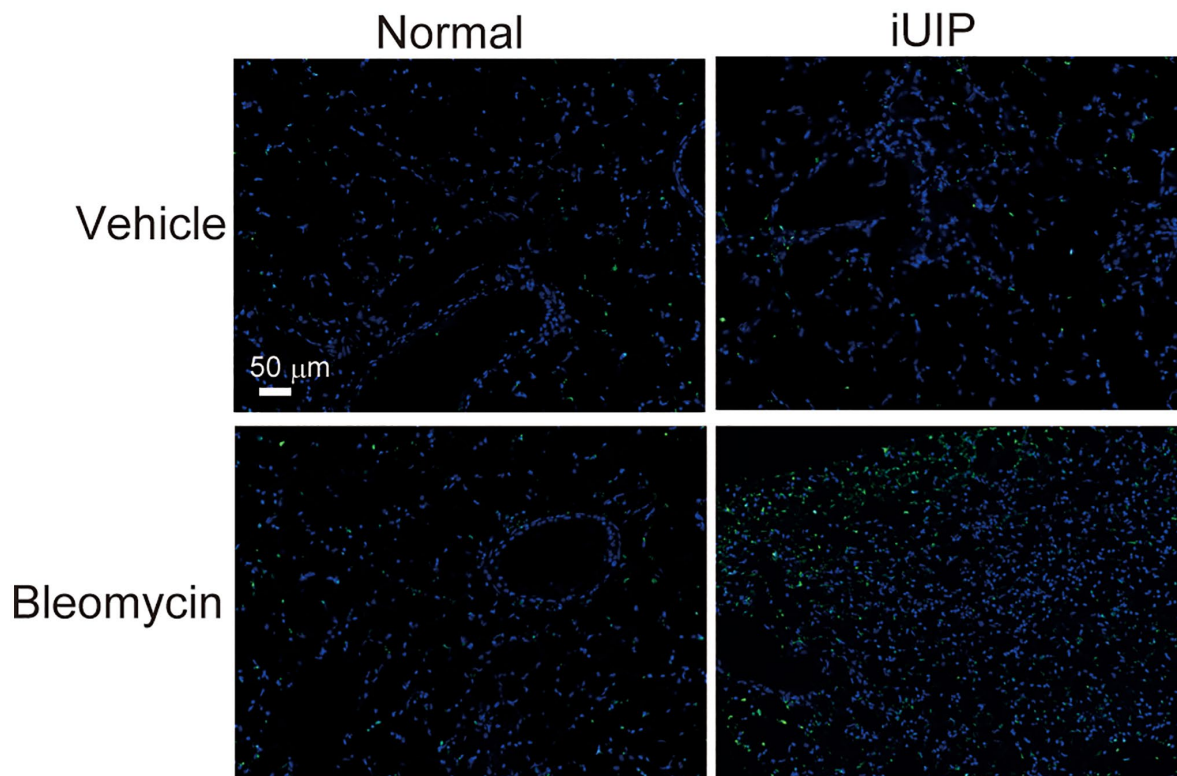

**Supplementary Figure 6.** Normal and iUIP PCLS were treated with the vehicle or 1  $\mu$ M bleomycin for 48 h, and paraffin-embedded sections were stained for TUNEL-positive cells. Scale bar indicates 50  $\mu$ m.

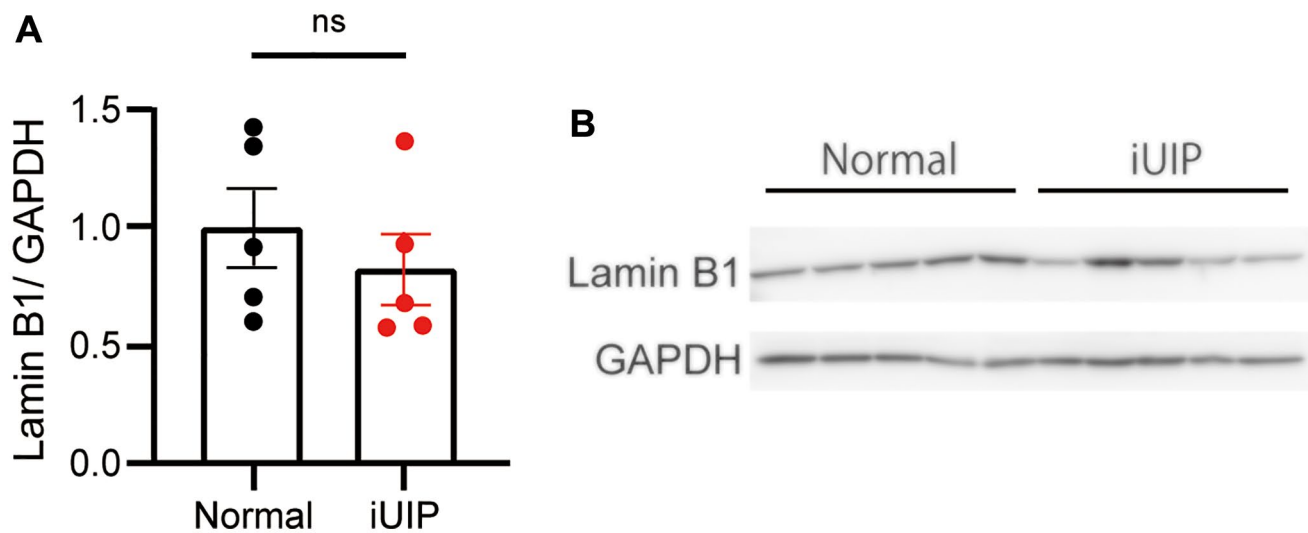

**Supplementary Figure 7.** (A, B) Lamin B1 expression in normal and lungs with iUIP was determined using WB. GAPDH was used as an internal control. The results are shown as mean  $\pm$  SE of five mouse lungs at each group. "ns", not statistically significant.



Vehicle

Bleomycin

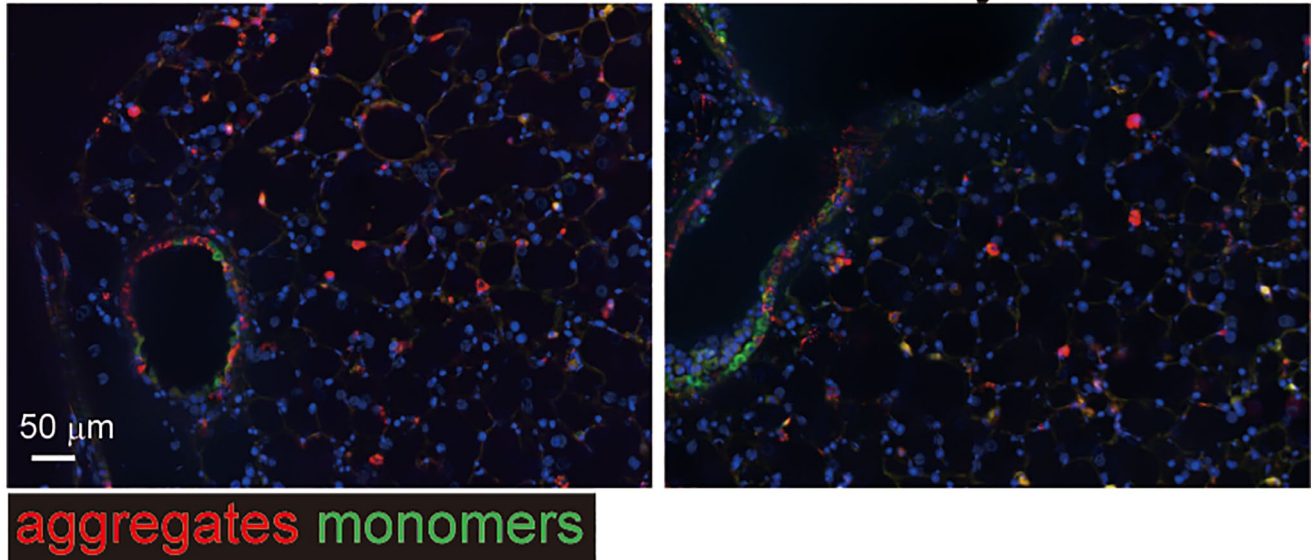

Supplementary Figure 8. Age-matched control PCLS were treated with vehicle or 1  $\mu$ M of bleomycin for 4 h, and stained using JC-1 MitoMP detection kit. Scale bar indicates 50  $\mu$ m.
